# Supplementary material for: In Vitro Hemocompatibility and Cytotoxicity Evaluation of Halloysite Nanotubes for Biomedical Application
Source: Hindawi journal article supplement (doi:10.1155/2015/685323), 2015-01-01
Supplement: f1 [file 685323.f1.doc]

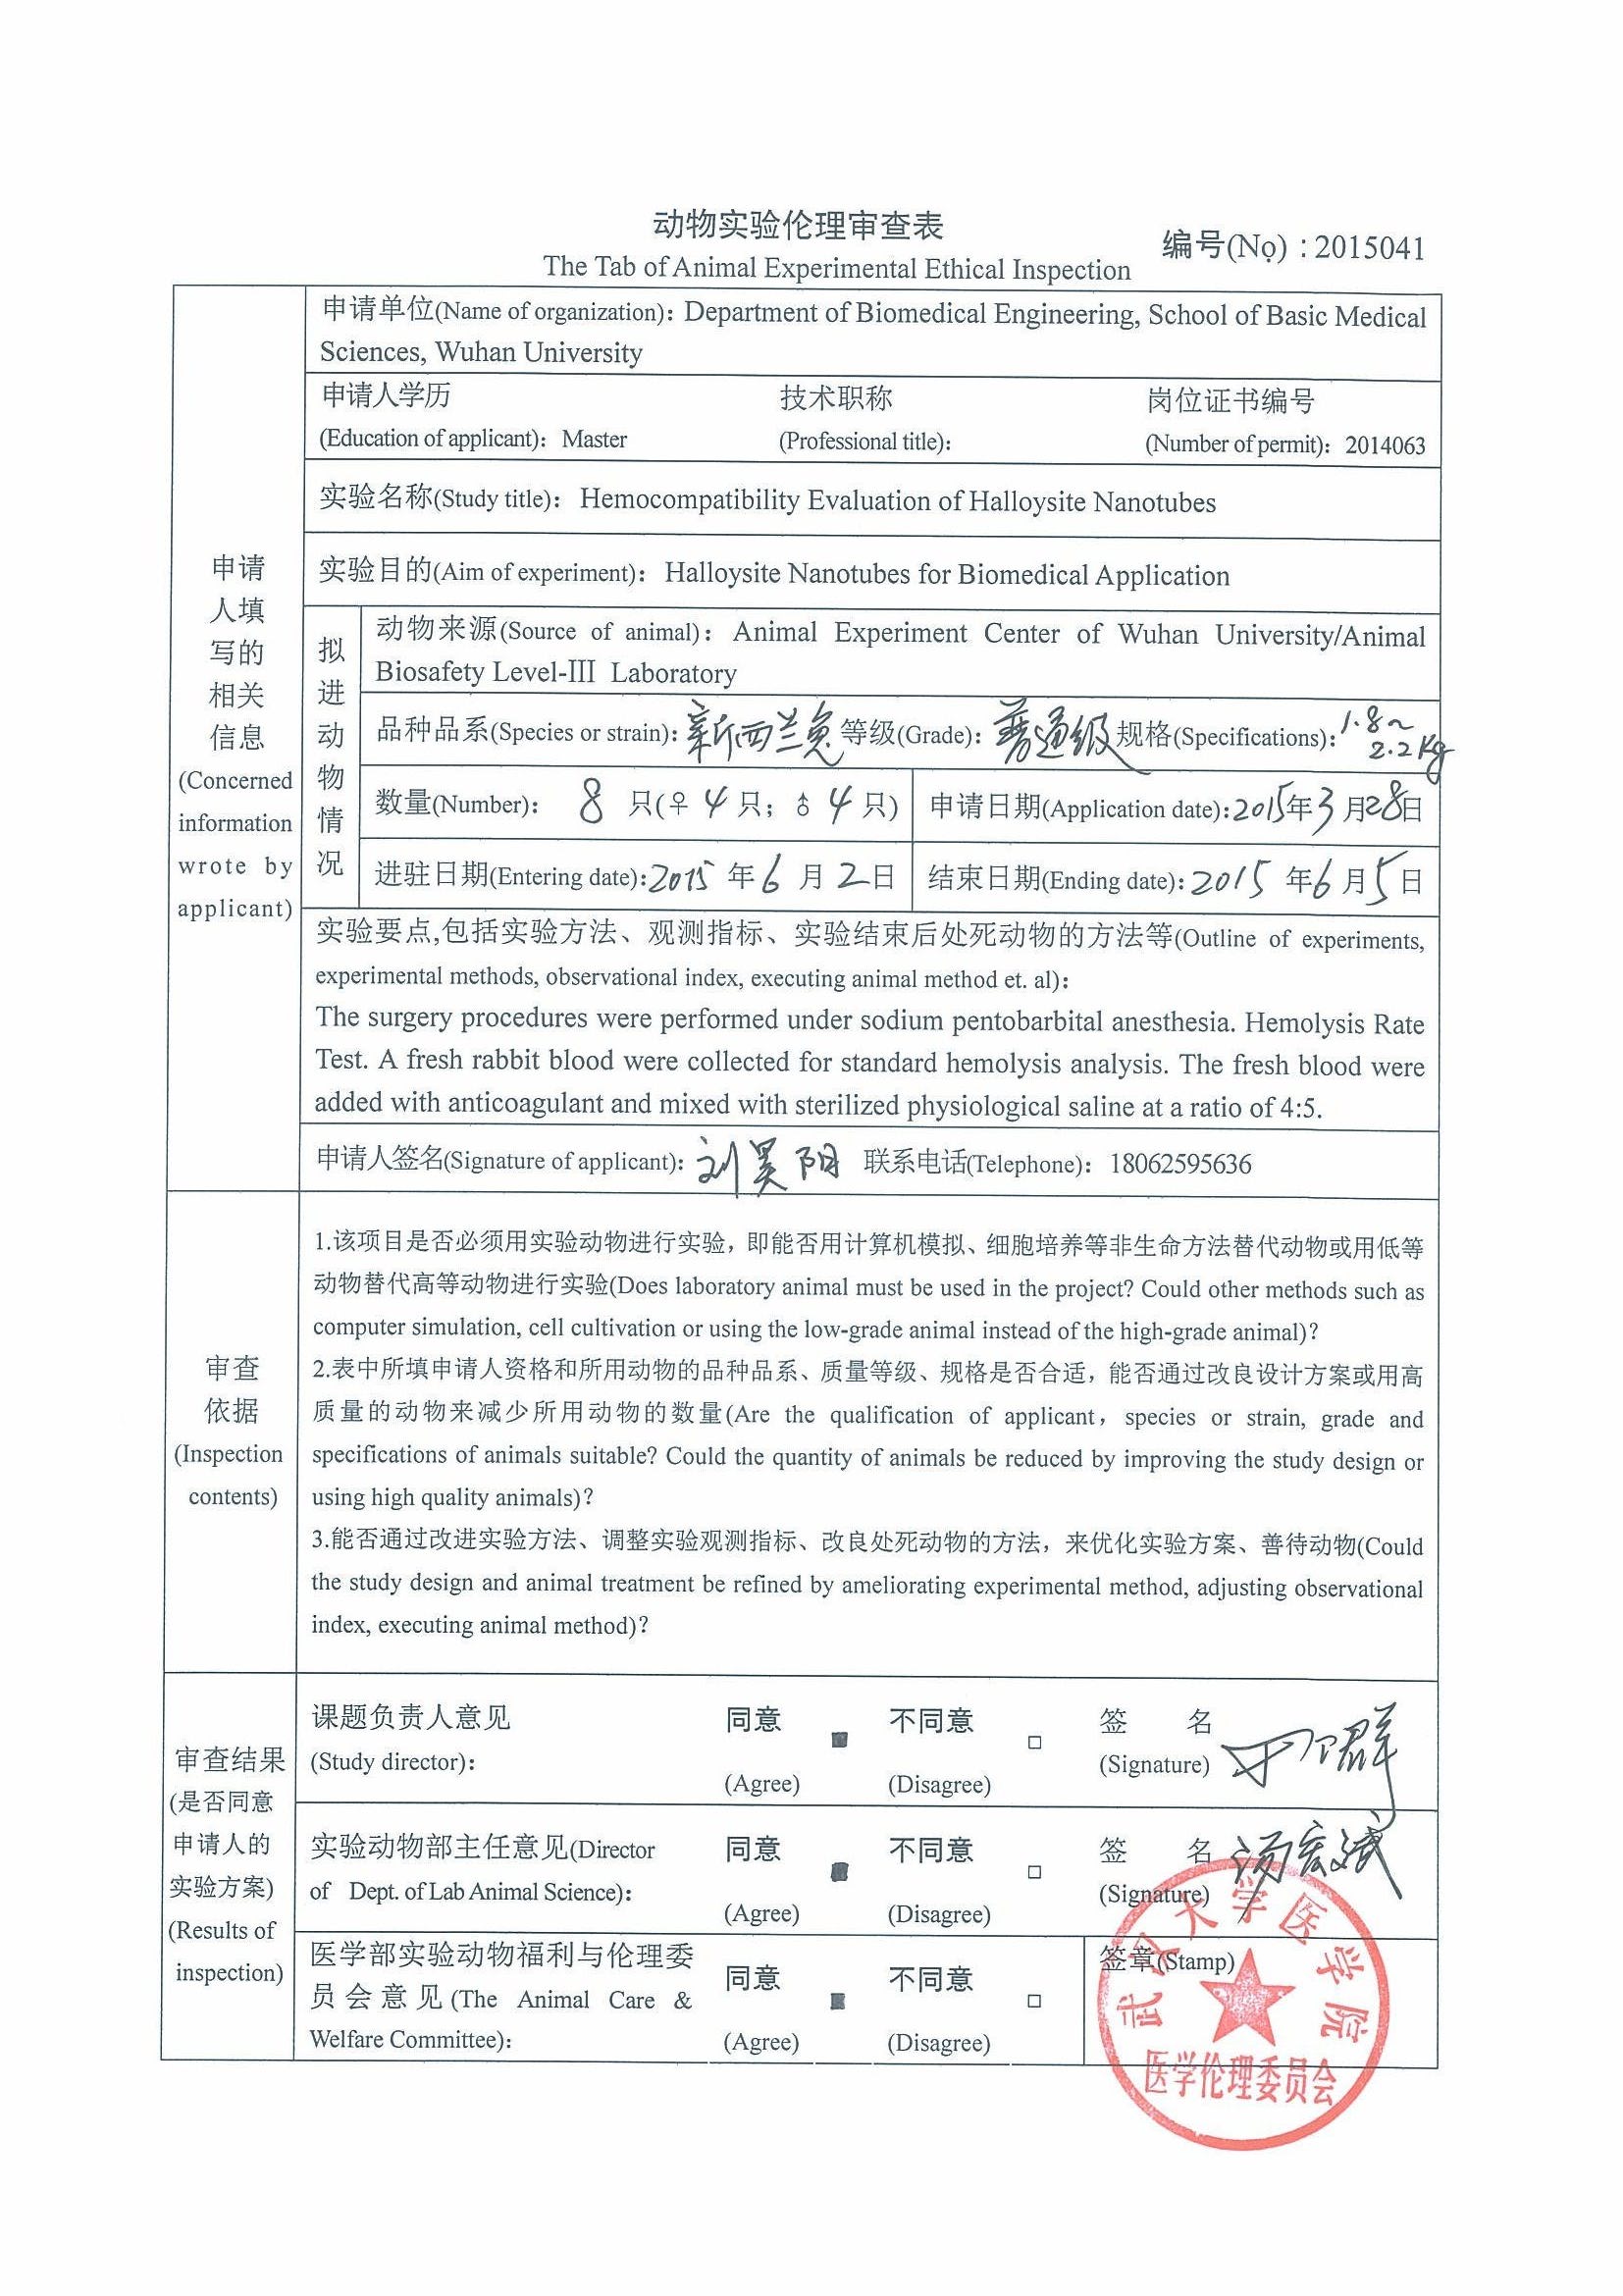


Figure S1. Scanning electronic table of animal experimental ethical inspection was approved by the ethical committee of Wuhan University School of Medicine.


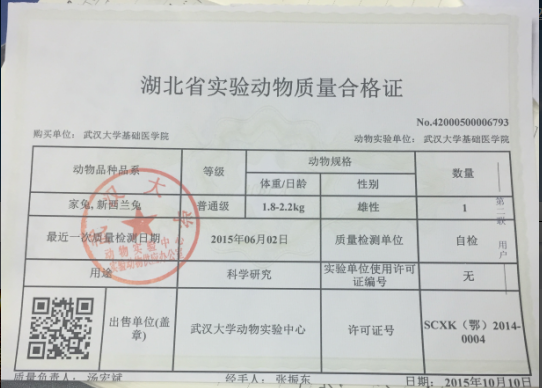


Figure S2. Scanning electronic document of the quality certification of rabbit involved in this research.


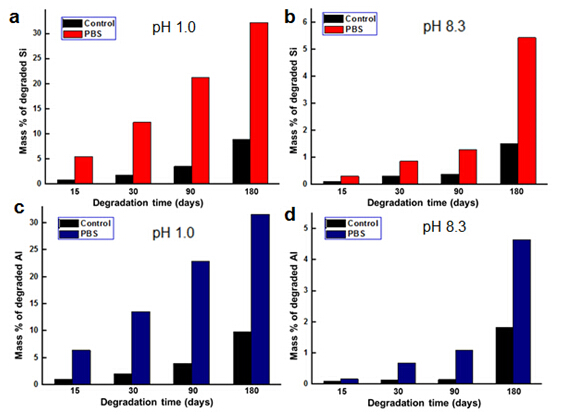


Figure S3. Silicon and aluminum elements mass % of degraded HNTs in different pH PBS solutions


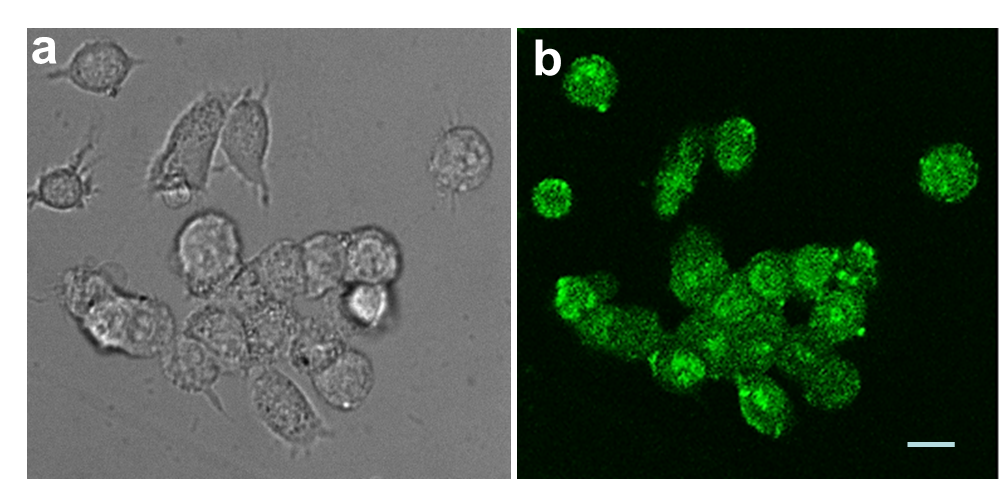


Figure S4. The differential-interference contrast (DIC) image(a) and fluorescence image (b) of FITC labeled HNTs. Scale bar is 10 μm.
